# Supplementary material for: Characterization of M Cells in Tear Duct-Associated Lymphoid Tissue of Mice: A Potential Role in Immunosurveillance on the Ocular Surface
Source: PubMed Central journal article supplement (PMC8645900; doi:10.3389/fimmu.2021.779709), 2021-11-22
Supplement: DataSheet_1.pdf [file DataSheet_1.pdf]

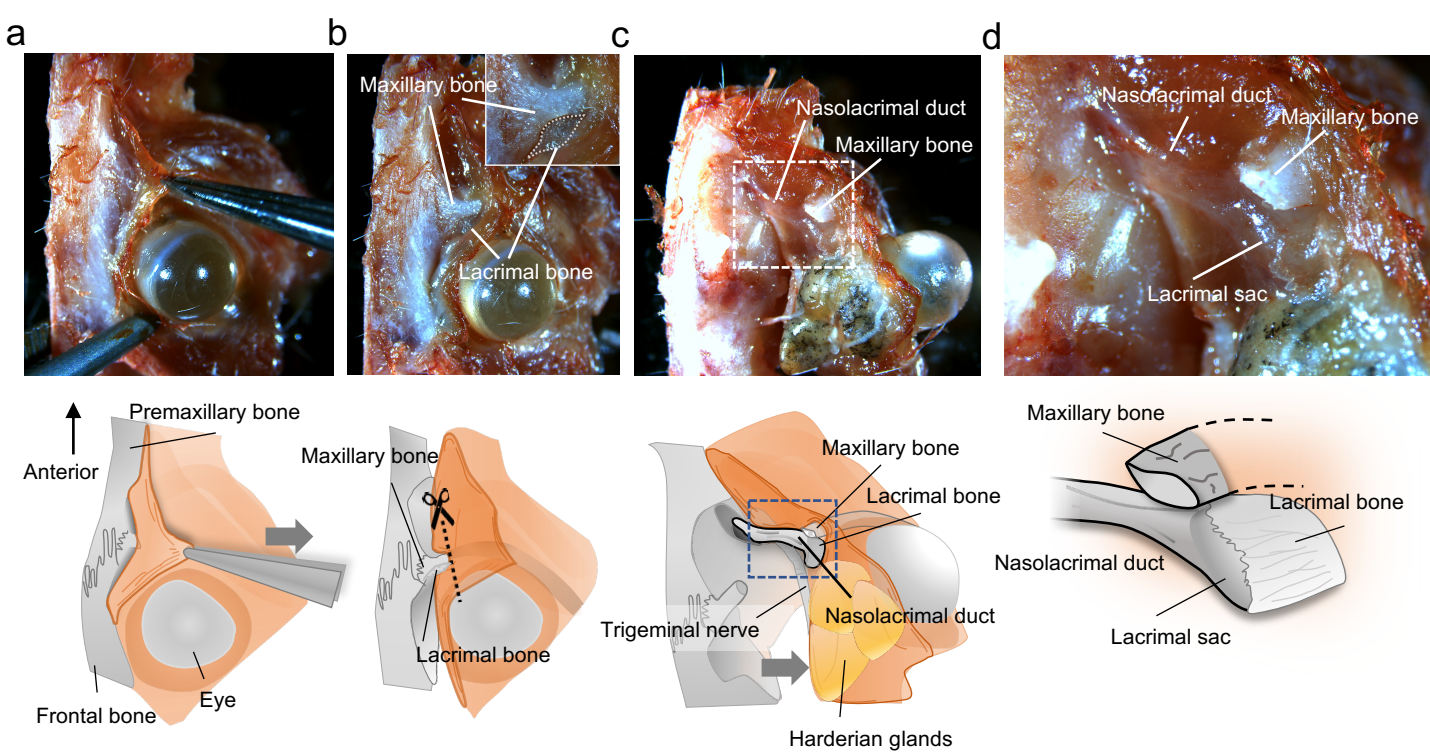

### Supplementary Figure 1

The preparation of nasolacrimal duct from mouse head. The head was amputated in half along the midline and the incisor and hard palate were removed by scissor. This is an illustration for isolating of the nasolacrimal duct of the right eye. Frontal, premaxillary, maxillary, and lacrimal bones was exposed by a precision tweezer No.5 (a, b). Subsequently, the maxillary bone was carefully amputated with scissors so as not to damage the lacrimal bone and the associated lacrimal sac (b). The nasolacrimal duct was then exposed by carefully peeling off the face from bones (c, d).

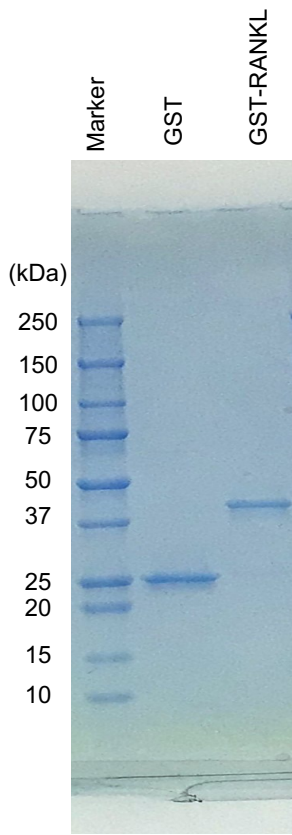

### Supplementary Figure 2

Purified GST (25 kDa) and GST-RANKL (40 kDa) proteins (1.25  $\mu$ g/lane) were separated by SDS-PAGE and stained with CBB.

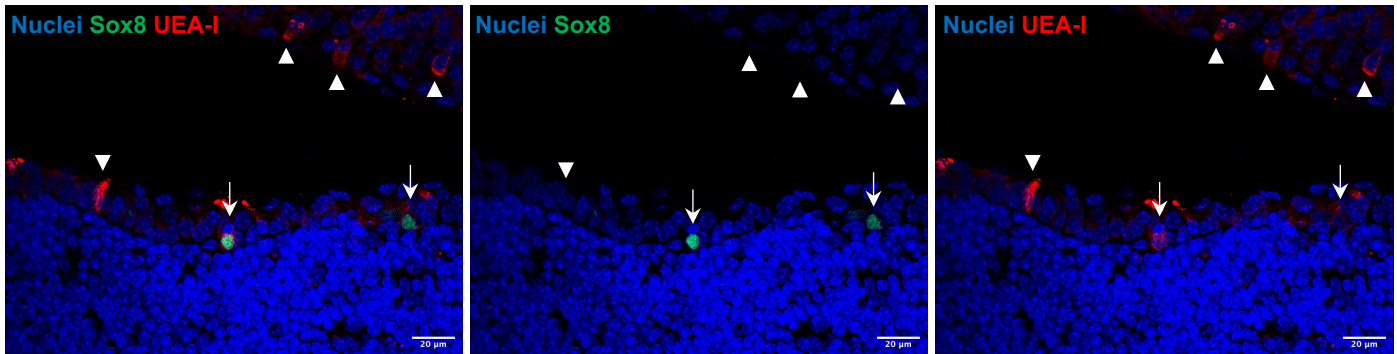

### Supplementary Figure 3

Tissue sections prepared from the nasolacrimal duct including TALT were stained with anti-Sox8 antibodies (green) and UEA-I (red). Nuclei were stained with Hoechst 33342 (blue). UEA-I+ Sox8+ cells were found in FAE (arrow), whereas UEA-I+ Sox8- cells were found both in FAE and outside of FAE (arrowheads). Bars: 20  $\mu$ m.

A

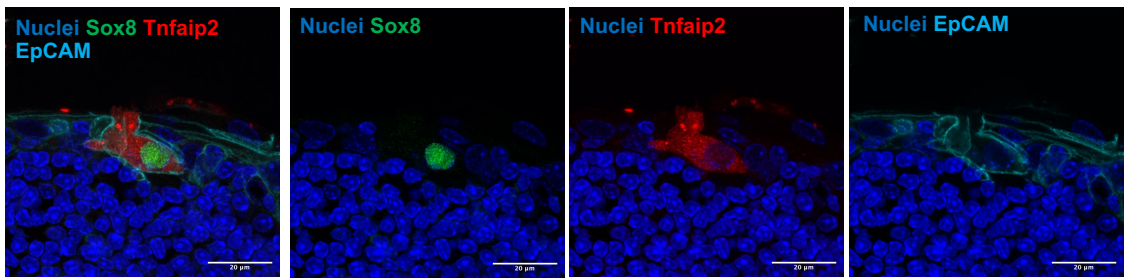

B

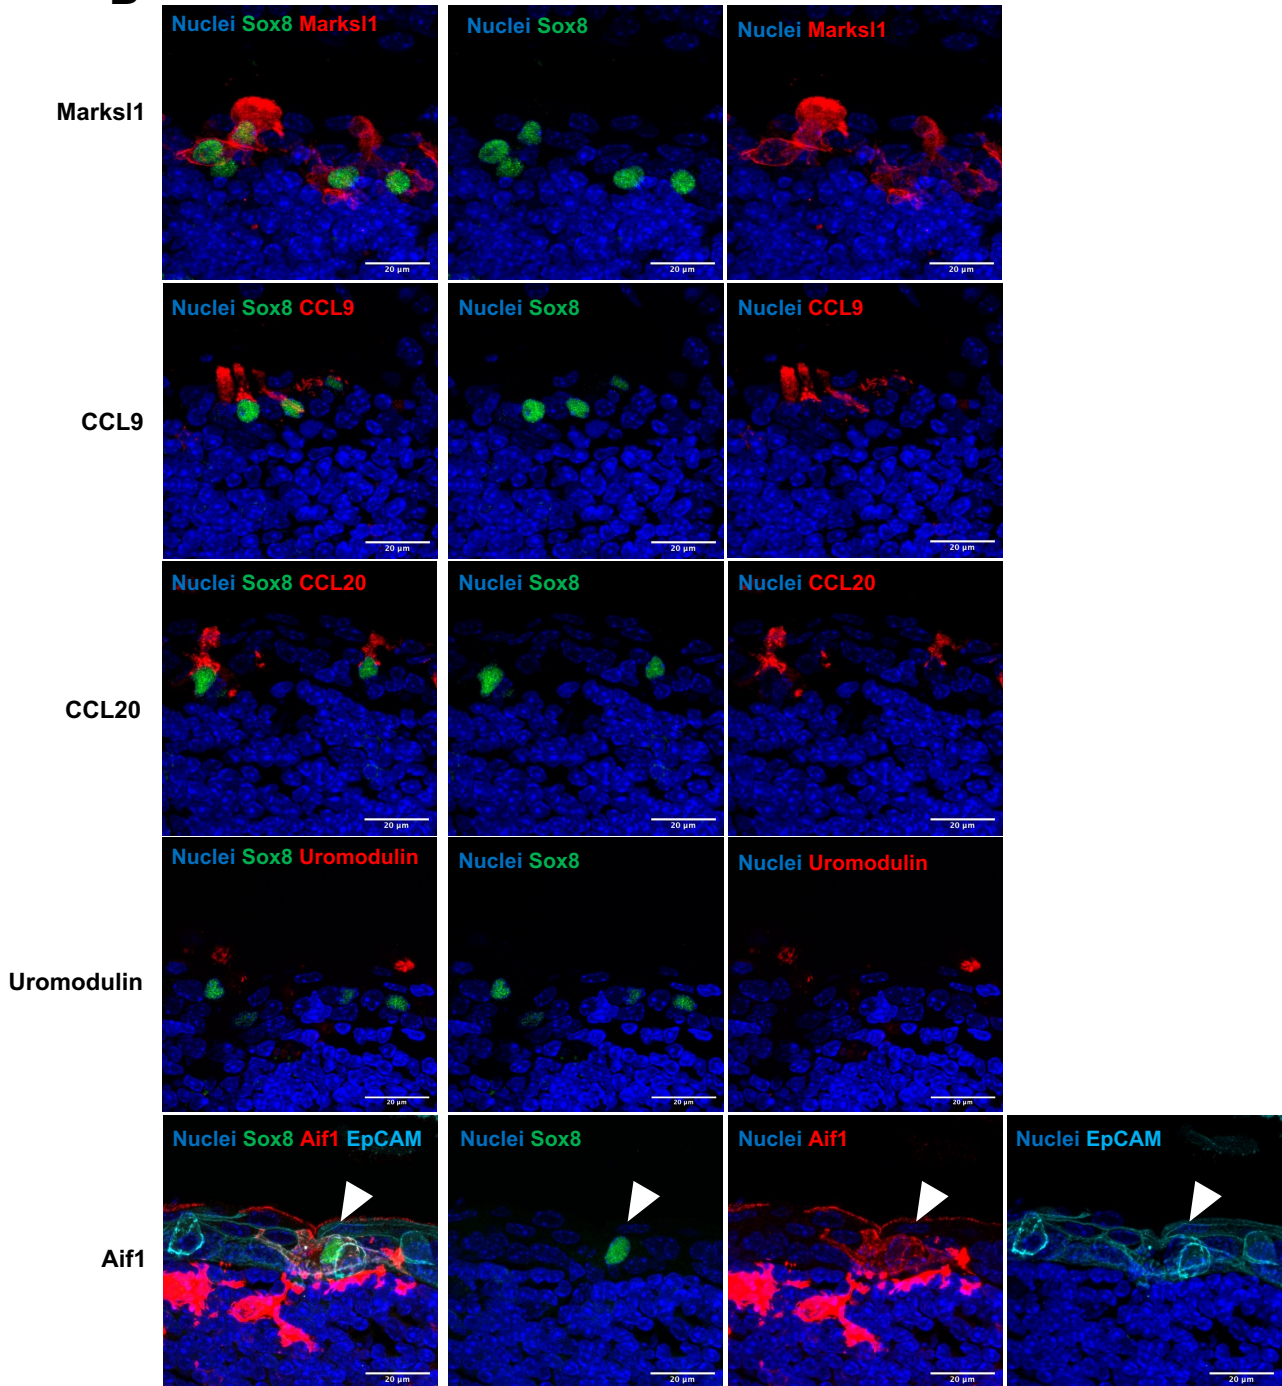

#### Supplementary Figure 4

(A) Sox8 (green) Tnfaip2 (red) double-positive cells in the TALT FAE simultaneously express EpCAM (cyan) that is an epithelial cell marker. Nuclei were counterstained with Hoechst 33342 (blue). Bars: 20 $\mu$ m. n = 3 animals. (B) Confocal microscopic images of TALT FAE prepared through cryosections and stained with indicated antibodies in each column. Sox8 (Green) and respective M cell markers (Red): Marks11, CCL9, CCL20, Uromodulin, and Aif1. Arrowheads show a Sox8<sup>+</sup> Aif1<sup>+</sup> EpCAM<sup>+</sup> cell. Nuclei were stained with Hoechst 33342 (blue). Bars: 20 $\mu$ m. Representative images of those obtained from at least 3 animals are shown.

Nuclei *Tnfsf11* DIC

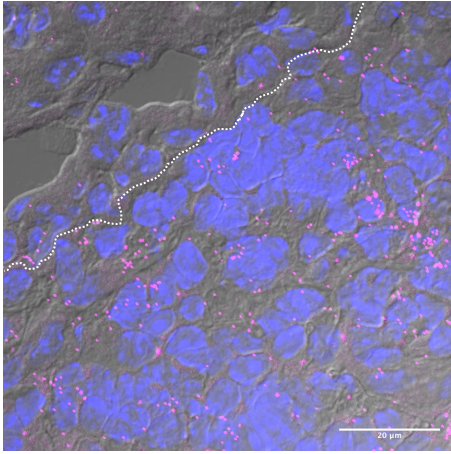

Nuclei *Tnfsf11*

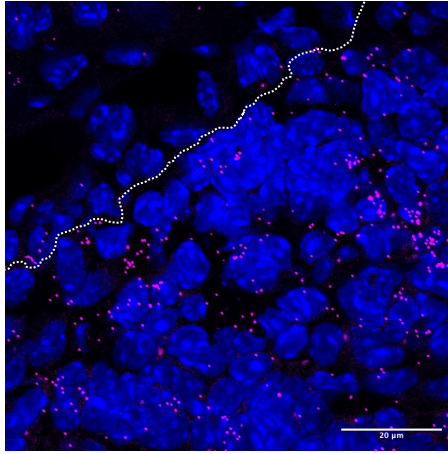

Nuclei *Tnfsf11*

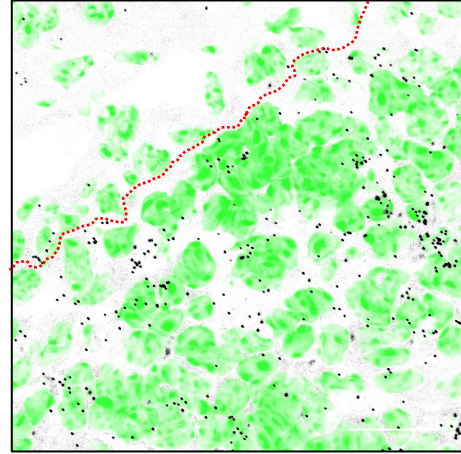

### Supplementary Figure 5

Fluorescence in situ hybridization (FISH) images of TALT FAE of BALB/c mice using oligonucleotide probes for *Tnfsf11* encoding RANKL. One image is represented by different pseudo-colors; the locations of *Tnfsf11b* are represented by magenta dots on the left and the center panels and black dots on the right panel. Nuclei are blue in the left and center panels and green in the right panel. Basal membranes are shown by white line in the left and the center panel, and red line in the right panels. DIC (gray); differential interference contrast. Bars: 20 µm. Representative images of those obtained from at least 3 animals are shown.

**A****Nuclei Sox8 GP2**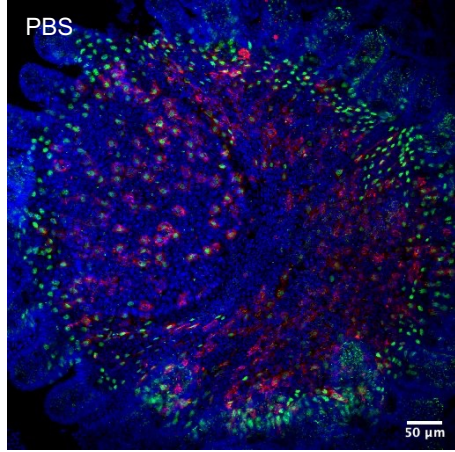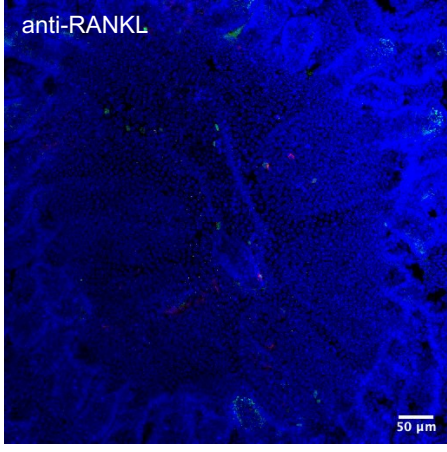**B****Nuclei GP2 Sox8 Tnfaip2**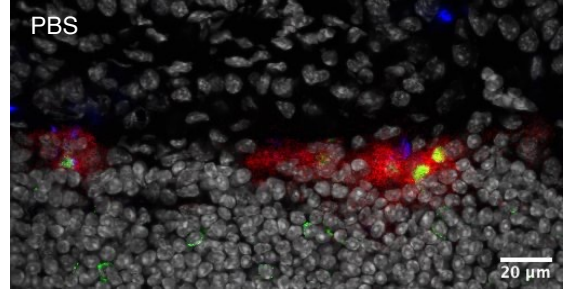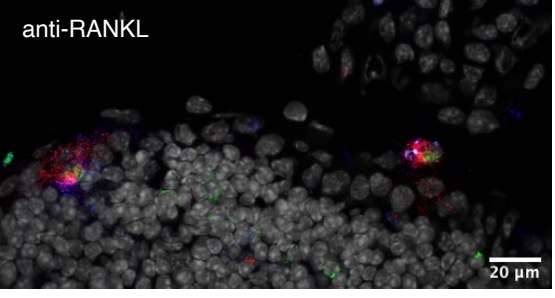**C**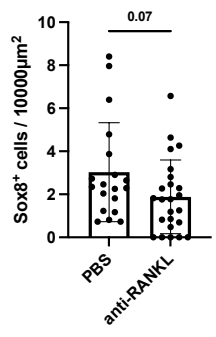**Supplementary Figure 6**

Mice were intraperitoneally injected with anti-RANKL antibodies two times every four days. Four days after second injection, mice were euthanized and were subjected to immunofluorescence analysis. (A) Whole-mount immunostaining of the FAE of Peyer's patches for Sox8 (green) and GP2 (red). Nuclei were stained with Hoechst 33342 (blue). Bars: 20 µm. (B) The expression of GP2 (blue), Sox8 (green) and Tnfaip2 (red) in TALT FAE. Nuclei were stained with Hoechst 33342 (gray). Bars: 20 µm. (C) Quantification of Sox8<sup>+</sup> cells in the TALT FAE. Data were presented as the mean ± standard deviation. Student's t-test, n = 3 animals, respectively. Each symbol represents the number of Sox8<sup>+</sup> cells per 10000 µm<sup>2</sup> of cryosections.

**A**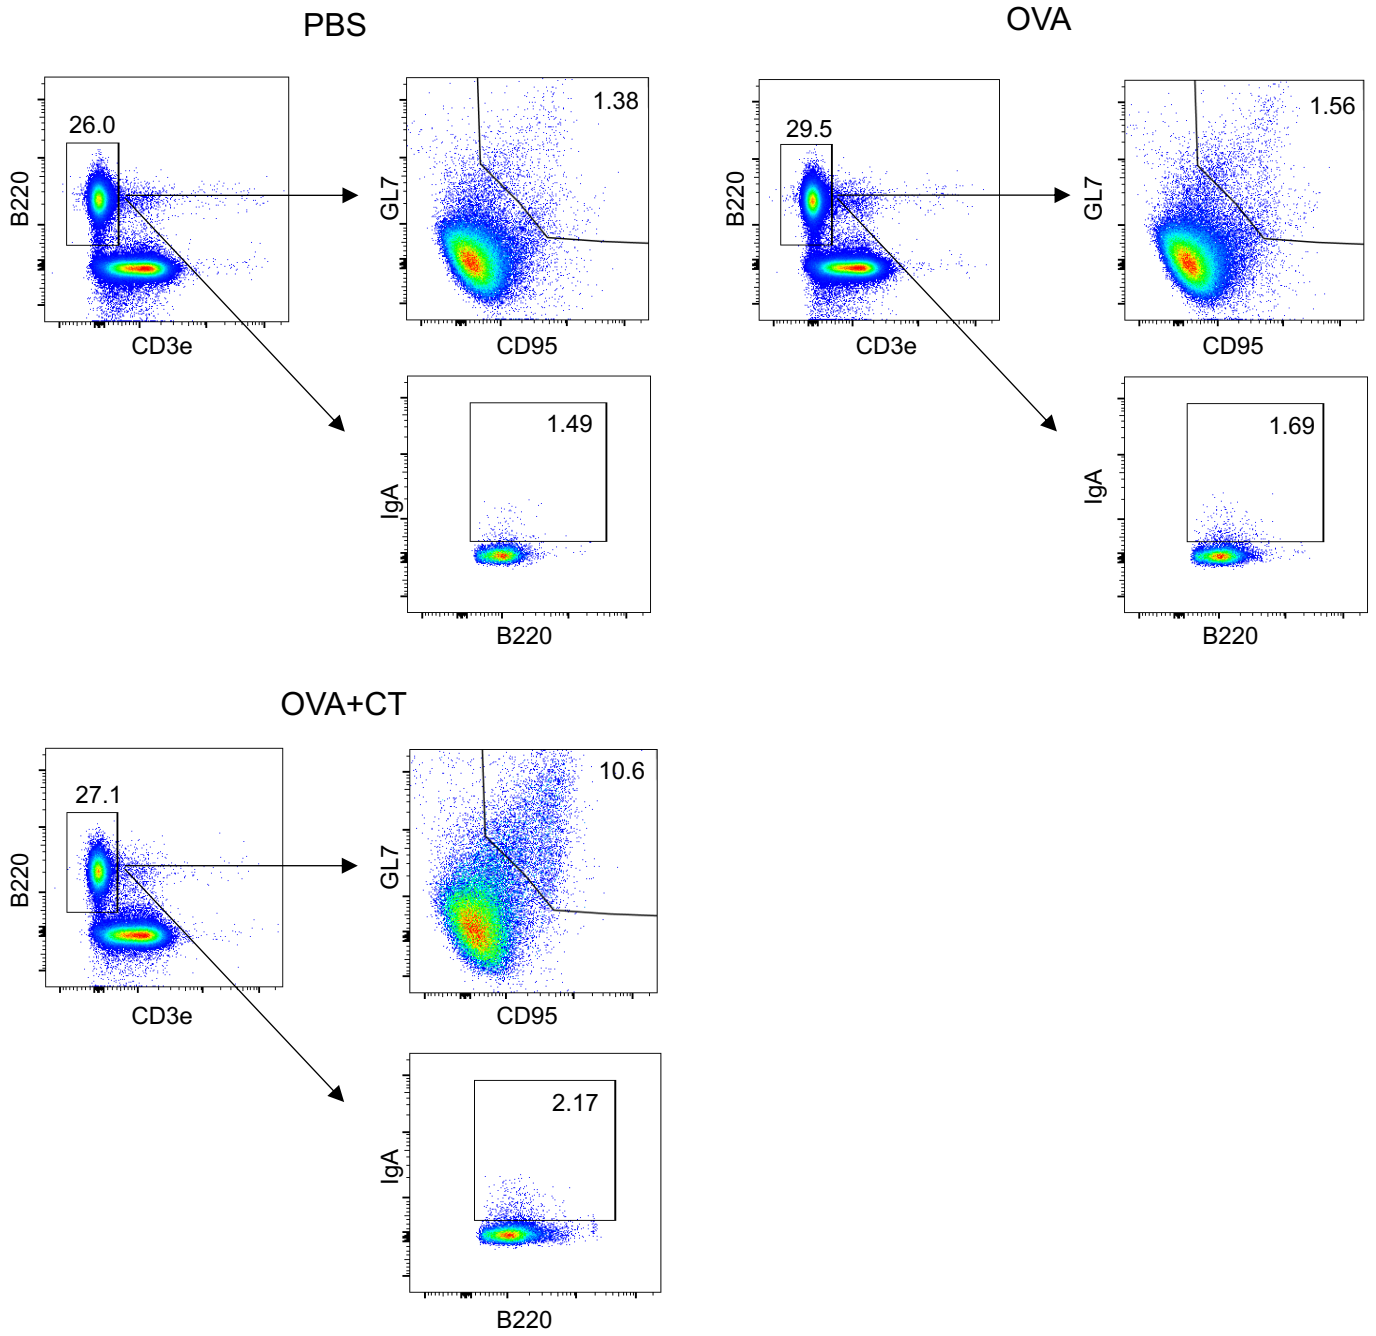**B**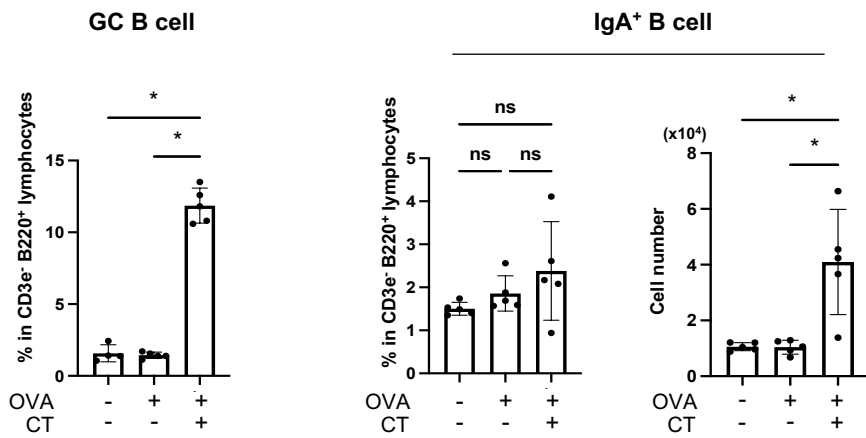

C

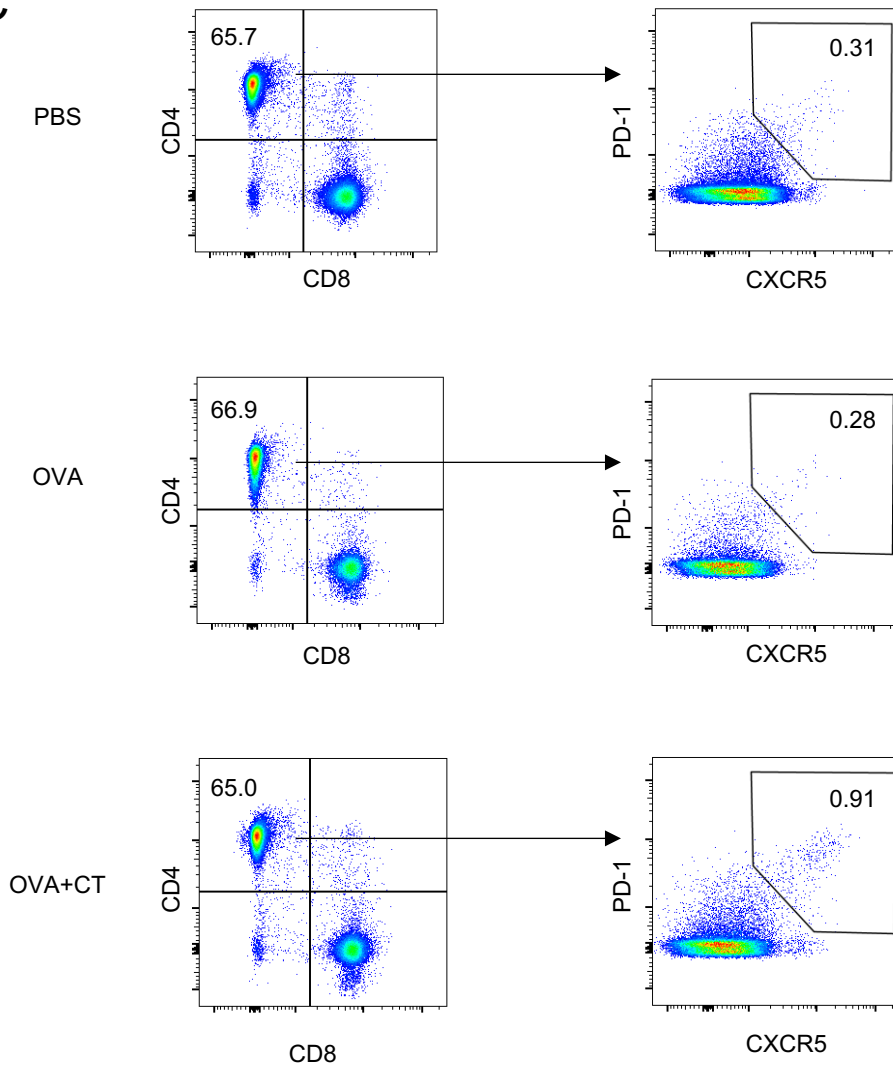

D

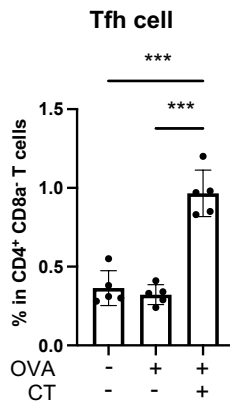

**Supplementary Figure 7**

FACS sorting strategies for subsets of GC B cells & IgA<sup>+</sup> B cells (A, B) and Tfh cells (C, D). Numbers adjacent to outlined areas in right panels show proportion of GC B cells or IgA<sup>+</sup> B cells in CD3e<sup>+</sup> B220<sup>+</sup> lymphocytes or Tfh cells in CD4<sup>+</sup> CD8<sup>-</sup> T cells in the cervical and submandibular lymph nodes (cLN and smLN). Data are presented the mean  $\pm$  standard deviation. \*\*\*  $p < 0.001$ , \*  $p < 0.05$ , ns; not significant (GC B cell and IgA<sup>+</sup> B cell: Kruskal-Wallis test, Tfh cell: one-way ANOVA by Tukey's test, PBS:  $n = 4$  or  $5$ , OVA:  $n = 5$ , OVA+CT:  $n = 5$  animals)

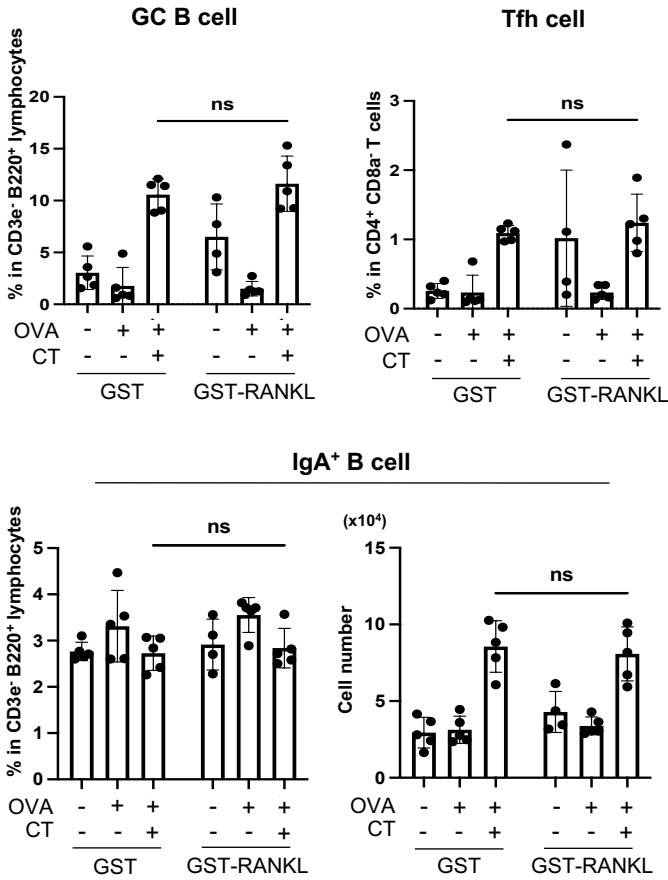

### Supplementary Figure 8

The frequencies of GC B cells in CD3e<sup>-</sup> B220<sup>+</sup> lymphocytes and Tfh cells in CD8a<sup>-</sup> CD4<sup>+</sup> T cells in cLN and smLN from BALB/c mice injected with GST or GST-RANKL daily for 3 days (first and third week: 5 mg/kg, second week: 2.5 mg/kg) before instillation of OVA plus CT by eye drops. Data are representative from two independent experiments and are presented as the mean  $\pm$  standard deviation. ns; not significant (two-way ANOVA, PBS/GST: n = 5, OVA/GST: n = 5, OVA+CT/GST: n = 5, PBS/GST-RANKL: n = 4, OVA/GST-RANKL: n = 5, OVA+CT/GST-RANKL: n = 5 animals).



Supplementary Table 1 : List of the antibodies and lectin for immunostaining analysis

| <b>Primary antibodies</b>           | <b>Host</b> | <b>Dilution</b> | <b>Source</b>                       |
|-------------------------------------|-------------|-----------------|-------------------------------------|
| anti-B220                           | rat         | 1:200           | BioLegend; clone RA3-6B2            |
| anti-Sox8                           | guinea pig  | 1:2000          | Generated in-house (17)             |
| anti-GP2                            | rat         | 1:200           | MBL; clone 2F11-C3                  |
| anti-Tnfaip2                        | rabbit      | 1:200           | Generated in-house (24)             |
| anti-CCL9                           | goat        | 1:100           | R&D systems; AF463                  |
| anti-CCL20                          | goat        | 1:200           | R&D systems; AF760                  |
| anti-OPG                            | goat        | 1:400           | R&D systems; AF549                  |
| anti-Aif1                           | goat        | 1:200           | abcam; ab5076                       |
| anti-Marks11                        | rabbit      | 1:200           | Proteintech; 10002-2-AP             |
| anti-Uromodulin                     | sheep       | 1:200           | R&D systems; AF5175                 |
| anti-Spi-B                          | sheep       | 1:200           | R&D systems; AF7204                 |
| anti-ZO-1                           | rabbit      | 1:200           | Thermo fisher Scientific; 61-7300   |
| anti-RANKL                          | guinea pig  | 1:1000          | Generated in-house                  |
| anti-RANK                           | goat        | 1:400           | R&D systems; AF692                  |
| anti-EpCAM                          | rat         | 1:200           | eBiosciences; clone G8.8            |
| <b>Secondly antibodies</b>          | <b>Host</b> | <b>Dilution</b> | <b>Source</b>                       |
| HRP anti-rat IgG                    | goat        | 1:1000          | Thermo fisher Scientific; 31470     |
| Alexa Fluor 488 anti-rat IgG        | donkey      | 1:800           | Jackson ImmunoResearch; 712-545-153 |
| Alexa Fluor 488 anti-guinea pig IgG | donkey      | 1:800           | Jackson ImmunoResearch; 706-545-148 |
| Cy3 anti-sheep IgG                  | donkey      | 1:800           | Jackson ImmunoResearch; 713-165-147 |
| Cy3 anti-guinea pig IgG             | donkey      | 1:800           | Jackson ImmunoResearch; 706-165-148 |
| Cy3 anti-goat IgG                   | donkey      | 1:800           | Jackson ImmunoResearch; 705-165-147 |
| Cy5 anti-rat IgG                    | donkey      | 1:800           | Jackson ImmunoResearch; 712-175-153 |
| Alexa Fluor 488 anti-rabbit IgG     | donkey      | 1:800           | Thermo fisher Scientific; A32790    |
| Alexa Fluor 555 anti-rabbit IgG     | donkey      | 1:800           | Thermo fisher Scientific; A32794    |
| Alexa Fluor 647 anti-rabbit IgG     | donkey      | 1:800           | Thermo fisher Scientific; A32795    |
| <b>A Lectin</b>                     | <b>Host</b> | <b>Dilution</b> | <b>Source</b>                       |
| Rhodamine-conjugated UEA I          | -           | 1:200           | VECTOR laboratories; RL-1062-2      |
| Alexa Fluor 488 PNA                 | -           | 1:400           | Thermo fisher Scientific; L21409    |

Supplementary Table 2: List of the oligonucleotide primers

| Target gene      | sequence                                                                                 |
|------------------|------------------------------------------------------------------------------------------|
| <i>Gapdh</i>     | Forward 5' -AGGTCGGTGTGAACGGATTTG- 3'<br>Reverse 5' -TGTAGACCATGTAGTTGAGGTC- 3'          |
| <i>Sox8</i>      | Forward 5' -CGAGGGGATACTGCTGAGG-3'<br>Reverse 5' -AGCTCTGCGTTATGGAGATGC- 3'              |
| <i>Spib</i>      | Forward 5' -CCGAGGGGAGGGGATCTGAG- 3'<br>Reverse 5' -GGAGGAGAACTGGAAGACGCCG- 3'           |
| <i>Tnfaip2</i>   | Forward 5' -GTGCAGAACCTCTACCCCAATG- 3'<br>Reverse 5' -TGGAGAATGTCGATGGCCA- 3'            |
| <i>Tnfrsf11b</i> | Forward 5' -ACCCAGAAACTGGTCATCAGC- 3'<br>Reverse 5' -CTGCAATACACACACTCATCACT- 3'         |
| <i>Gp2</i>       | Forward 5' -GATACTGCACAGACCCCTCCA- 3'<br>Reverse 5' -GCAGTTCCGGTCATTGAGGTA - 3'          |
| <i>Tnfrsf11a</i> | Forward 5' -CCAGGAGAGGCATTATGAGCA- 3'<br>Reverse 5' -ACTGTCTGGAGGTAGGAGTGC- 3'           |
| <i>Ccl9</i>      | Forward 5' -CAACAGAGACAAAAGAAGTCCAGAG- 3'<br>Reverse 5' -CTTGCTGATAAAGATGATGCCC- 3'      |
| <i>Ccl20</i>     | Forward 5' -TGCTCTTCCTTGCTTTGGCATGGGTA- 3'<br>Reverse 5' -TCTGTGCAGTGATGTGCAGGTGAAGC- 3' |
| <i>Aif1</i>      | Forward 5' -TGAGGAGATTTCAACAGAAGCTGA- 3'<br>Reverse 5' -CCTCAGACGCTGGTTGTCTT- 3'         |

Supplementary Table 3 : List of the antibodies for Flow cytometry

| <b>Antibodies and Streptavidin</b> | <b>Dilution</b> | <b>Source</b>                   |
|------------------------------------|-----------------|---------------------------------|
| Biotin anti-IgA                    | 1:100           | BD Biosciences; 556978          |
| Streptavidin FITC Conjugate        | 1:400           | eBioscience; 11-4317-87         |
| Alexa Fluor 647 anti-GL7           | 1:100           | BioLegend; 144606               |
| APC-R700 anti-CD95                 | 1:100           | BD Biosciences; 565130          |
| Brilliant Violet 510 anti-CD45     | 1:400           | BioLegend; 103138               |
| APC-H7 anti-B220                   | 1:400           | BD Biosciences; 565371          |
| PE anti-CD3e                       | 1:400           | eBiosciences; 12-0031-83        |
| APC anti-CXCR5                     | 1:50            | BioLegend; 145506               |
| Brilliant Violet 421 anti-PD-1     | 1:100           | BioLegend; 135221               |
| Red Fluor 710 anti-CD4             | 1:400           | TONBO Biosciences; 80-0042-U100 |
| FITC anti-CD8a                     | 1:400           | TONBO Biosciences; 35-0081-U500 |
